# Supplementary material for: Evolution and gene capture in ancient endogenous retroviruses - insights from the crocodilian genomes
Source: PubMed Central journal article supplement (PMC4299795; doi:10.1186/s12977-014-0071-2), 2014-12-12
Supplement: 12977_2014_71_MOESM1_ESM.pdf [file 12977_2014_71_MOESM1_ESM.pdf]

## **Additional File 1: Supplementary Tables**

This file contains:

- **Supplementary Table S1:** Summary of ERV insertions with a chain score >300 detected from each of the genomes, and an approximation of the ERV content.
- **Supplementary Table S2:** Summary of ERV families and their predicted distribution among crocodylians.
- **Supplementary Table S3:** UniProt ID, and scientific and common names of additional species used for phylogenetic analysis of the KIT-ligand-like ORF.
- **Supplementary Table S4:** UniProt ID, and scientific and common names of additional species used for phylogenetic analysis of the Nectin3-like ORF.

**Supplementary Table S1:** Summary of ERV insertions with a chain score >300 detected from each of the genomes, and an approximation of the ERV content.

|                                                 | <i>A. mississippiensis</i> | <i>C. porosus</i> | <i>G. gangeticus</i> |
|-------------------------------------------------|----------------------------|-------------------|----------------------|
| Genome size <sup>a</sup>                        | 2.5                        | 2.78              | 2.5                  |
| Version <sup>b</sup>                            | aMiss_0.2                  | croc_sub2         | ggan_v0.2            |
| Length of assembly                              | 2,144,153,452              | 2,123,474,087     | 2,882,656,219        |
| Number of scaffolds                             | 8,897                      | 23,365            | 47,351               |
| Estimated proportion of genome in assembly      | 0.86×                      | 0.76×             | 1.15×                |
| Number of ERV chains (>300)                     | 722                        | 772               | 561                  |
| Complete ERVs                                   | 154                        | 211               | 106                  |
| Both LTRs                                       | 492                        | 465               | 293                  |
| One LTR                                         | 80                         | 77                | 66                   |
| No LTRs                                         | 150                        | 230               | 202                  |
| Solo LTRs                                       | 79,445                     | 119,753           | 140,412              |
| Estimated ERV content <sup>c</sup> (ERV chains) | 1.88% (0.25%)              | 1.63% (0.26%)     | 1.22% (0.14%)        |

<sup>a</sup> Estimates of genome size taken from St John et al. [1].

<sup>b</sup> Genomes were downloaded before the 'freeze' of assembly and refinement. Therefore these may not represent the latest, or the published version of the genomes.

<sup>c</sup> Estimates and breakdown of all transposable elements available in Green et al. [2].

**Supplementary Table S2:** Summary of ERV families and their predicted distribution among crocodylians. The distribution Crocodylia refers to families found in all three species whereas *Longirostres* refers to those only found in both *C. porosus* and *G. gangeticus*. *Alligatoridae*, *Crocodylidae*, and *Gavialidae* refer to the predicted distributions of families found only in a single species.

| Family    | ERV Class | Distribution  | No. seqs | TSD length (bp) | Estimated Age (MY) | Pol similarity | Corresponding RepBase consensus                                      | Additional characteristics          |
|-----------|-----------|---------------|----------|-----------------|--------------------|----------------|----------------------------------------------------------------------|-------------------------------------|
| CrocERV1  | ERV1      | Longirostres  | 67       | 4               | 80.00              | 0.63           | ERV1-6_Crp<br>ERV1-1_Gav                                             |                                     |
| CrocERV2  | ERV1      | Alligatoridae | 5        | 4               | 39.74              | 0.83           | ERV1-6_AMi                                                           |                                     |
| CrocERV3  | ERV1      | Alligatoridae | 6        | 4               | 39.10              | 0.64           | ERV1-3_Ami<br>ERV1-3B_AMi                                            |                                     |
| CrocERV4  | ERV1      | Longirostres  | 3        | 4               | 67.31              | 0.68           | ERV1-2_Gav                                                           |                                     |
| CrocERV5  | ERV1      | Crocodylia    | 7        | 4               | 28.21              | 0.72           | ERV1-1_Ami<br>ERV1-2_Crp<br>ERV1-7_Crp                               |                                     |
| CrocERV6  | ERV1      | Longirostres  | 4        | 4               |                    | 0.66           | ERV1-5_Crp<br>ERV1-5B_Crp                                            |                                     |
| CrocERV7  | ERV1      | Longirostres  | 6        | 4               | 37.82              | 0.74           | ERV1-1_Crp                                                           |                                     |
| CrocERV8  | ERV1      | Longirostres  | 8        | 4               | 108.21             | 0.62           | ERV1-3_Crp                                                           |                                     |
| CrocERV9  | ERV1      | Alligatoridae | 4        | 4               | 37.61              | 0.77           | ERV1-4_AMi                                                           |                                     |
| CrocERV10 | ERV1      | Alligatoridae | 2        | 4               | 56.41              | 0.80           | ERV1-9_AMi                                                           |                                     |
| CrocERV11 | ERV1      | Crocodylia    | 9        | 4               | 64.10              | 0.65           | ERV1-7_Ami<br>ERV1-12_AMi                                            |                                     |
| CrocERV12 | ERV1      | Crocodylia    | 33       | 4               | 70.15              | 0.61           | ERV1-2_Ami<br>ERV1-4_Crp<br>ERV1-4_Gav<br>ERV1-10_Ami                |                                     |
| CrocERV13 | ERV1      | Alligatoridae | 1        | 4               |                    |                | ERV1-8_AMi                                                           |                                     |
| CrocERV14 | ERV1      | Alligatoridae | 1        | 4               |                    |                | ERV1-8_Crp                                                           |                                     |
| CrocERV15 | ERV1      | Crocodylidae  | 1        | 4               |                    |                |                                                                      |                                     |
| CrocERV16 | ERV3      | Crocodylia    | 4        | 6               | 62.82              | 0.50           | ERV3-2_Crp                                                           | Lacks dUTPase<br>Unusual TSD length |
| CrocERV17 | ERV3      | Crocodylia    | 6        | 5               |                    | 0.51           | ERV3-2_AMi                                                           | Lacks dUTPase                       |
| CrocERV18 | ERV4      | Longirostres  | 11       | 5               | 85.26              | 0.66           | SFV1-2_Crp<br>SFV1-15_Gav                                            |                                     |
| CrocERV19 | ERV4      | Longirostres  | 9        | 5               | 221.15             | 0.59           | SFV1-3_Crp<br>SFV1-15_Crp<br>SFV1-5_Gav<br>SFV1-18_Gav               |                                     |
| CrocERV20 | ERV4      | Alligatoridae | 7        | 5               | 39.23              | 0.49           | SFV1-1_Ami<br>SFV1-8_Ami<br>SFV1-9_Ami<br>SFV1-11_Ami<br>SFV1-16_Ami |                                     |

|                |               |    |   |        |      |              |                                                                        |
|----------------|---------------|----|---|--------|------|--------------|------------------------------------------------------------------------|
|                |               |    |   |        |      | SFV1-20_AMi  |                                                                        |
| CrocERV21 ERV4 | Crocodylidae  | 3  | 5 | 64.10  | 0.65 | SFV1-12_Crp  |                                                                        |
| CrocERV22 ERV4 | Longirostres  | 8  | 5 | 77.56  | 0.52 | SFV1-22_Gav  |                                                                        |
| CrocERV23 ERV4 | Longirostres  | 2  | 5 | 67.95  | 0.65 | SFV1-19_Crp  |                                                                        |
| CrocERV24 ERV4 | Crocodylidae  | 3  | 5 | 57.69  | 0.75 | SFV1-10_Crp  |                                                                        |
| CrocERV25 ERV4 | Longirostres  | 4  | 5 |        | 0.65 | SFV1-1_Crp   |                                                                        |
|                |               |    |   |        |      | SFV1-2_Gav   |                                                                        |
| CrocERV26 ERV4 | Longirostres  | 8  | 5 |        | 0.55 | SFV1-7_Crp   |                                                                        |
|                |               |    |   |        |      | SFV1-8_Crp   |                                                                        |
| CrocERV27 ERV4 | Longirostres  | 4  | 5 | 0.00   | 0.39 | SFV1-20_Crp  |                                                                        |
| CrocERV28 ERV4 | Gavialidae    | 3  | 5 | 107.69 | 0.70 | SFV1-28_Gav  |                                                                        |
| CrocERV29 ERV4 | Longirostres  | 31 | 5 | 61.06  | 0.47 | SFV1-4_Crp   | One lineage encodes an additional ORF showing similarity to KIT-ligand |
|                |               |    |   |        |      | SFV1-5_Crp   |                                                                        |
|                |               |    |   |        |      | SFV1-6_Crp   |                                                                        |
|                |               |    |   |        |      | SFV1-11_Crp  |                                                                        |
|                |               |    |   |        |      | SFV1-14_Crp  |                                                                        |
|                |               |    |   |        |      | SFV1-14B_Crp |                                                                        |
|                |               |    |   |        |      | SFV1-17_Crp  |                                                                        |
|                |               |    |   |        |      | SFV1-1_Gav   |                                                                        |
|                |               |    |   |        |      | SFV1-4_Gav   |                                                                        |
|                |               |    |   |        |      | SFV1-8_Gav   |                                                                        |
|                |               |    |   |        |      | SFV1-9_Gav   |                                                                        |
|                |               |    |   |        |      | SFV1-10_Gav  |                                                                        |
|                |               |    |   |        |      | SFV1-12_Gav  |                                                                        |
|                |               |    |   |        |      | SFV1-13_Gav  |                                                                        |
|                |               |    |   |        |      | SFV1-14_Gav  |                                                                        |
|                |               |    |   |        |      | SFV1-16_Gav  |                                                                        |
|                |               |    |   |        |      | SFV1-17_Gav  |                                                                        |
|                |               |    |   |        |      | SFV1-19_Gav  |                                                                        |
|                |               |    |   |        |      | SFV1-20_Gav  |                                                                        |
|                |               |    |   |        |      | SFV1-21_Gav  |                                                                        |
|                |               |    |   |        |      | SFV1-23_Gav  |                                                                        |
|                |               |    |   |        |      | SFV1-24_Gav  |                                                                        |
|                |               |    |   |        |      | SFV1-25_Gav  |                                                                        |
|                |               |    |   |        |      | SFV1-25B_Gav |                                                                        |
| CrocERV30 ERV4 | Alligatoridae | 8  | 5 | 45.94  | 0.66 | SFV1-4_Ami   |                                                                        |
|                |               |    |   |        |      | SFV1-7_Ami   |                                                                        |
| CrocERV31 ERV4 | Alligatoridae | 6  | 5 | 63.68  | 0.72 | SFV1-5_Ami   | One lineage encodes nectin3-like ORF in place of <i>env</i>            |
|                |               |    |   |        |      | SFV1-10_AMi  |                                                                        |
| CrocERV32 ERV4 | Alligatoridae | 3  | 5 | 30.13  | 0.72 | SFV1-3_Ami   |                                                                        |
|                |               |    |   |        |      | SFV1-17_AMi  |                                                                        |
| CrocERV33 ERV4 | Alligatoridae | 6  | 5 | 91.67  | 0.63 | SFV1-2_Ami   |                                                                        |

---

|           |         |              |     |   |       |      |                                           |                 |
|-----------|---------|--------------|-----|---|-------|------|-------------------------------------------|-----------------|
| CrocERV34 | ERV4    | Longirostres | 4   | 5 | 47.44 | 0.53 | SFV1-6_AMi<br>SFV1-11_Gav<br>SFV1-11B_Gav |                 |
| CrocERV35 | ERV4    | Crocodylidae | 1   | 5 | 61.54 |      | SFV1-18_Crp                               |                 |
| CrocERV36 | ERV4    | Crocodylia   | 1   | 5 | 60.26 |      | SFV1-18_AMi<br>SFV1-21_Crp                |                 |
| CrocERV37 | Unknown | Crocodylia   | 2   | 4 |       | 0.68 | ERV-3_AMi<br>ERV-2B_Crp                   |                 |
| CrocERV38 | Unknown | Crocodylia   | 2   | 5 |       | 0.85 | ERV-5_AMi                                 |                 |
| CrocERV39 | Unknown | Crocodylia   | 1   | 4 |       |      | ERV-1_Crp<br>ERV-2_AMi                    |                 |
| CrocERV40 | Unknown | Crocodylia   | 1   | 5 |       |      | ERV-1_AMi<br>ERV-7_Crp                    |                 |
| CrocERV41 | ERV3    | Crocodylia   | N/A | 5 |       |      | ERV3-1_AMi                                | Encodes dUTPase |
| CrocERV42 | ERV4    | Longirostres | N/A | 5 |       |      | SFV1-16_Crp<br>SFV1-27_Gav                |                 |
| CrocERV43 | ERV4    | Longirostres | N/A | 5 |       |      | SFV1-3_Gav                                |                 |
| CrocERV44 | ERV4    | Gavialidae   | N/A | 5 |       |      | SFV1-6_Gav                                |                 |
| CrocERV45 | Unknown | Crocodylia   | N/A | 5 |       |      | ERV-4_AMi                                 |                 |

---

**Supplementary Table S3:** UniProt ID, and scientific and common names of additional species used for phylogenetic analysis of the KIT-ligand-like ORF.

| <b>UniProt/GenBank<br/>Accession number</b> | <b>Scientific name</b>                  | <b>Common name</b>       |
|---------------------------------------------|-----------------------------------------|--------------------------|
| A8WC00                                      | <i>Gasterosteus aculeatus aculeatus</i> | Three-spined stickleback |
| ADT62517                                    | <i>Anas platyrhynchos</i>               | Mallard duck             |
| B4F6K4                                      | <i>Xenopus tropicalis</i>               | Western clawed frog      |
| F6SDB0                                      | <i>Macaca mulatta</i>                   | Rhesus macaque           |
| F7C5I3                                      | <i>Ornithorhynchus anatinus</i>         | Platypus                 |
| F7EP53                                      | <i>Monodelphis domestica</i>            | Opossum                  |
| G1R0E6                                      | <i>Nomascus leucogenys</i>              | White-cheeked gibbon     |
| G3S4K2                                      | <i>Gorilla gorilla gorilla</i>          | Gorilla                  |
| G3VV70                                      | <i>Sarcophilus harrisii</i>             | Tasmanian devil          |
| H2NI76                                      | <i>Pongo abelii</i>                     | Sumatran orangutan       |
| H2Q6K8                                      | <i>Pan troglodytes</i>                  | Chimpanzee               |
| K7FR23                                      | <i>Pelodiscus sinensis</i>              | Chinese softshell turtle |
| NP_001018133                                | <i>Danio rerio</i>                      | Zebrafish                |
| P20826                                      | <i>Mus musculus</i>                     | House mouse              |
| P21581                                      | <i>Rattus norvegicus</i>                | Brown rat                |
| P21583                                      | <i>Homo sapiens</i>                     | Human                    |
| P79169                                      | <i>Felis catus</i>                      | Domestic cat             |
| Q06220                                      | <i>Canis familiaris</i>                 | Domestic dog             |
| Q09108                                      | <i>Gallus gallus</i>                    | Chicken                  |
| Q28132                                      | <i>Bos taurus</i>                       | Cow                      |
| Q29030                                      | <i>Sus scrofa</i>                       | Pig                      |
| Q7ZXV0                                      | <i>Xenopus laevis</i>                   | African clawed frog      |
| Q90314                                      | <i>Coturnix coturnix japonica</i>       | Japanese quail           |
| Q95M19                                      | <i>Capra hircus</i>                     | Goat                     |
| Q95MD2                                      | <i>Equus caballus</i>                   | Horse                    |
| Q95N18                                      | <i>Mustela vison</i>                    | American mink            |
| XP_003405659                                | <i>Loxodonta africana</i>               | African elephant         |
| XP_004459893                                | <i>Dasyopus novemcinctus</i>            | Nine-banded armadillo    |
| XP_005279181                                | <i>Chrysemys picta bellii</i>           | Painted turtle           |
| XP_005508365                                | <i>Columba livia</i>                    | Rock dove                |

**Supplementary Table S4:** UniProt ID, and scientific and common names of additional species used for phylogenetic analysis of the Nectin3-like ORF.

| UniProt/GenBank<br>Accession number | Scientific name                | Common name            |
|-------------------------------------|--------------------------------|------------------------|
| EMP37855                            | <i>Chelonia mydas</i>          | Green turtle           |
| NP_056295                           | <i>Homo sapiens</i>            | Human                  |
| XP_001362370                        | <i>Monodelphis domestica</i>   | Opossum                |
| XP_002940155                        | <i>Xenopus tropicalis</i>      | Western clawed frog    |
| XP_003202854                        | <i>Meleagris gallopavo</i>     | Wild turkey            |
| XP_003219129                        | <i>Anolis carolinensis</i>     | Carolina anole         |
| XP_003968614                        | <i>Takifugu rubripes</i>       | Pufferfish             |
| XP_004075606                        | <i>Oryzias latipes</i>         | Japanese rice fish     |
| XP_004456966                        | <i>Dasybus novemcinctus</i>    | Nine-banded armadillo  |
| XP_004558293                        | <i>Maylandia zebra</i>         | Zebra mbuna            |
| XP_005024167                        | <i>Anas platyrhynchos</i>      | Mallard duck           |
| XP_005144774                        | <i>Melepsittacus undulatus</i> | Budgerigar             |
| XP_005283666                        | <i>Chrysemys picta</i>         | Painted turtle         |
| XP_005492614                        | <i>Zonotrichia albicollis</i>  | White-throated sparrow |
| XP_005502646                        | <i>Columba livia</i>           | Rock dove              |

1. St John J, Braun E, Isberg S, Miles L, Chong A, Gongora J, Dalzell P, Moran C, Bed'Hom B, Abzhanov A, et al: **Sequencing three crocodylian genomes to illuminate the evolution of archosaurs and amniotes.** *Genome Biol* 2012, **13**:415.
2. Green RE, Braun EL, Armstrong J, Earl D, Nguyen N, Hickey G, Vandeweghe MW, St John JA, Capella-Gutiérrez S, Castoe TA, et al: **The genomes of three crocodylians provide insight into archosaur evolution.** *Science* Submitted.
