# Supplementary material for: Evolution and gene capture in ancient endogenous retroviruses - insights from the crocodilian genomes
Source: PubMed Central journal article supplement (PMC4299795; doi:10.1186/s12977-014-0071-2), 2014-12-12

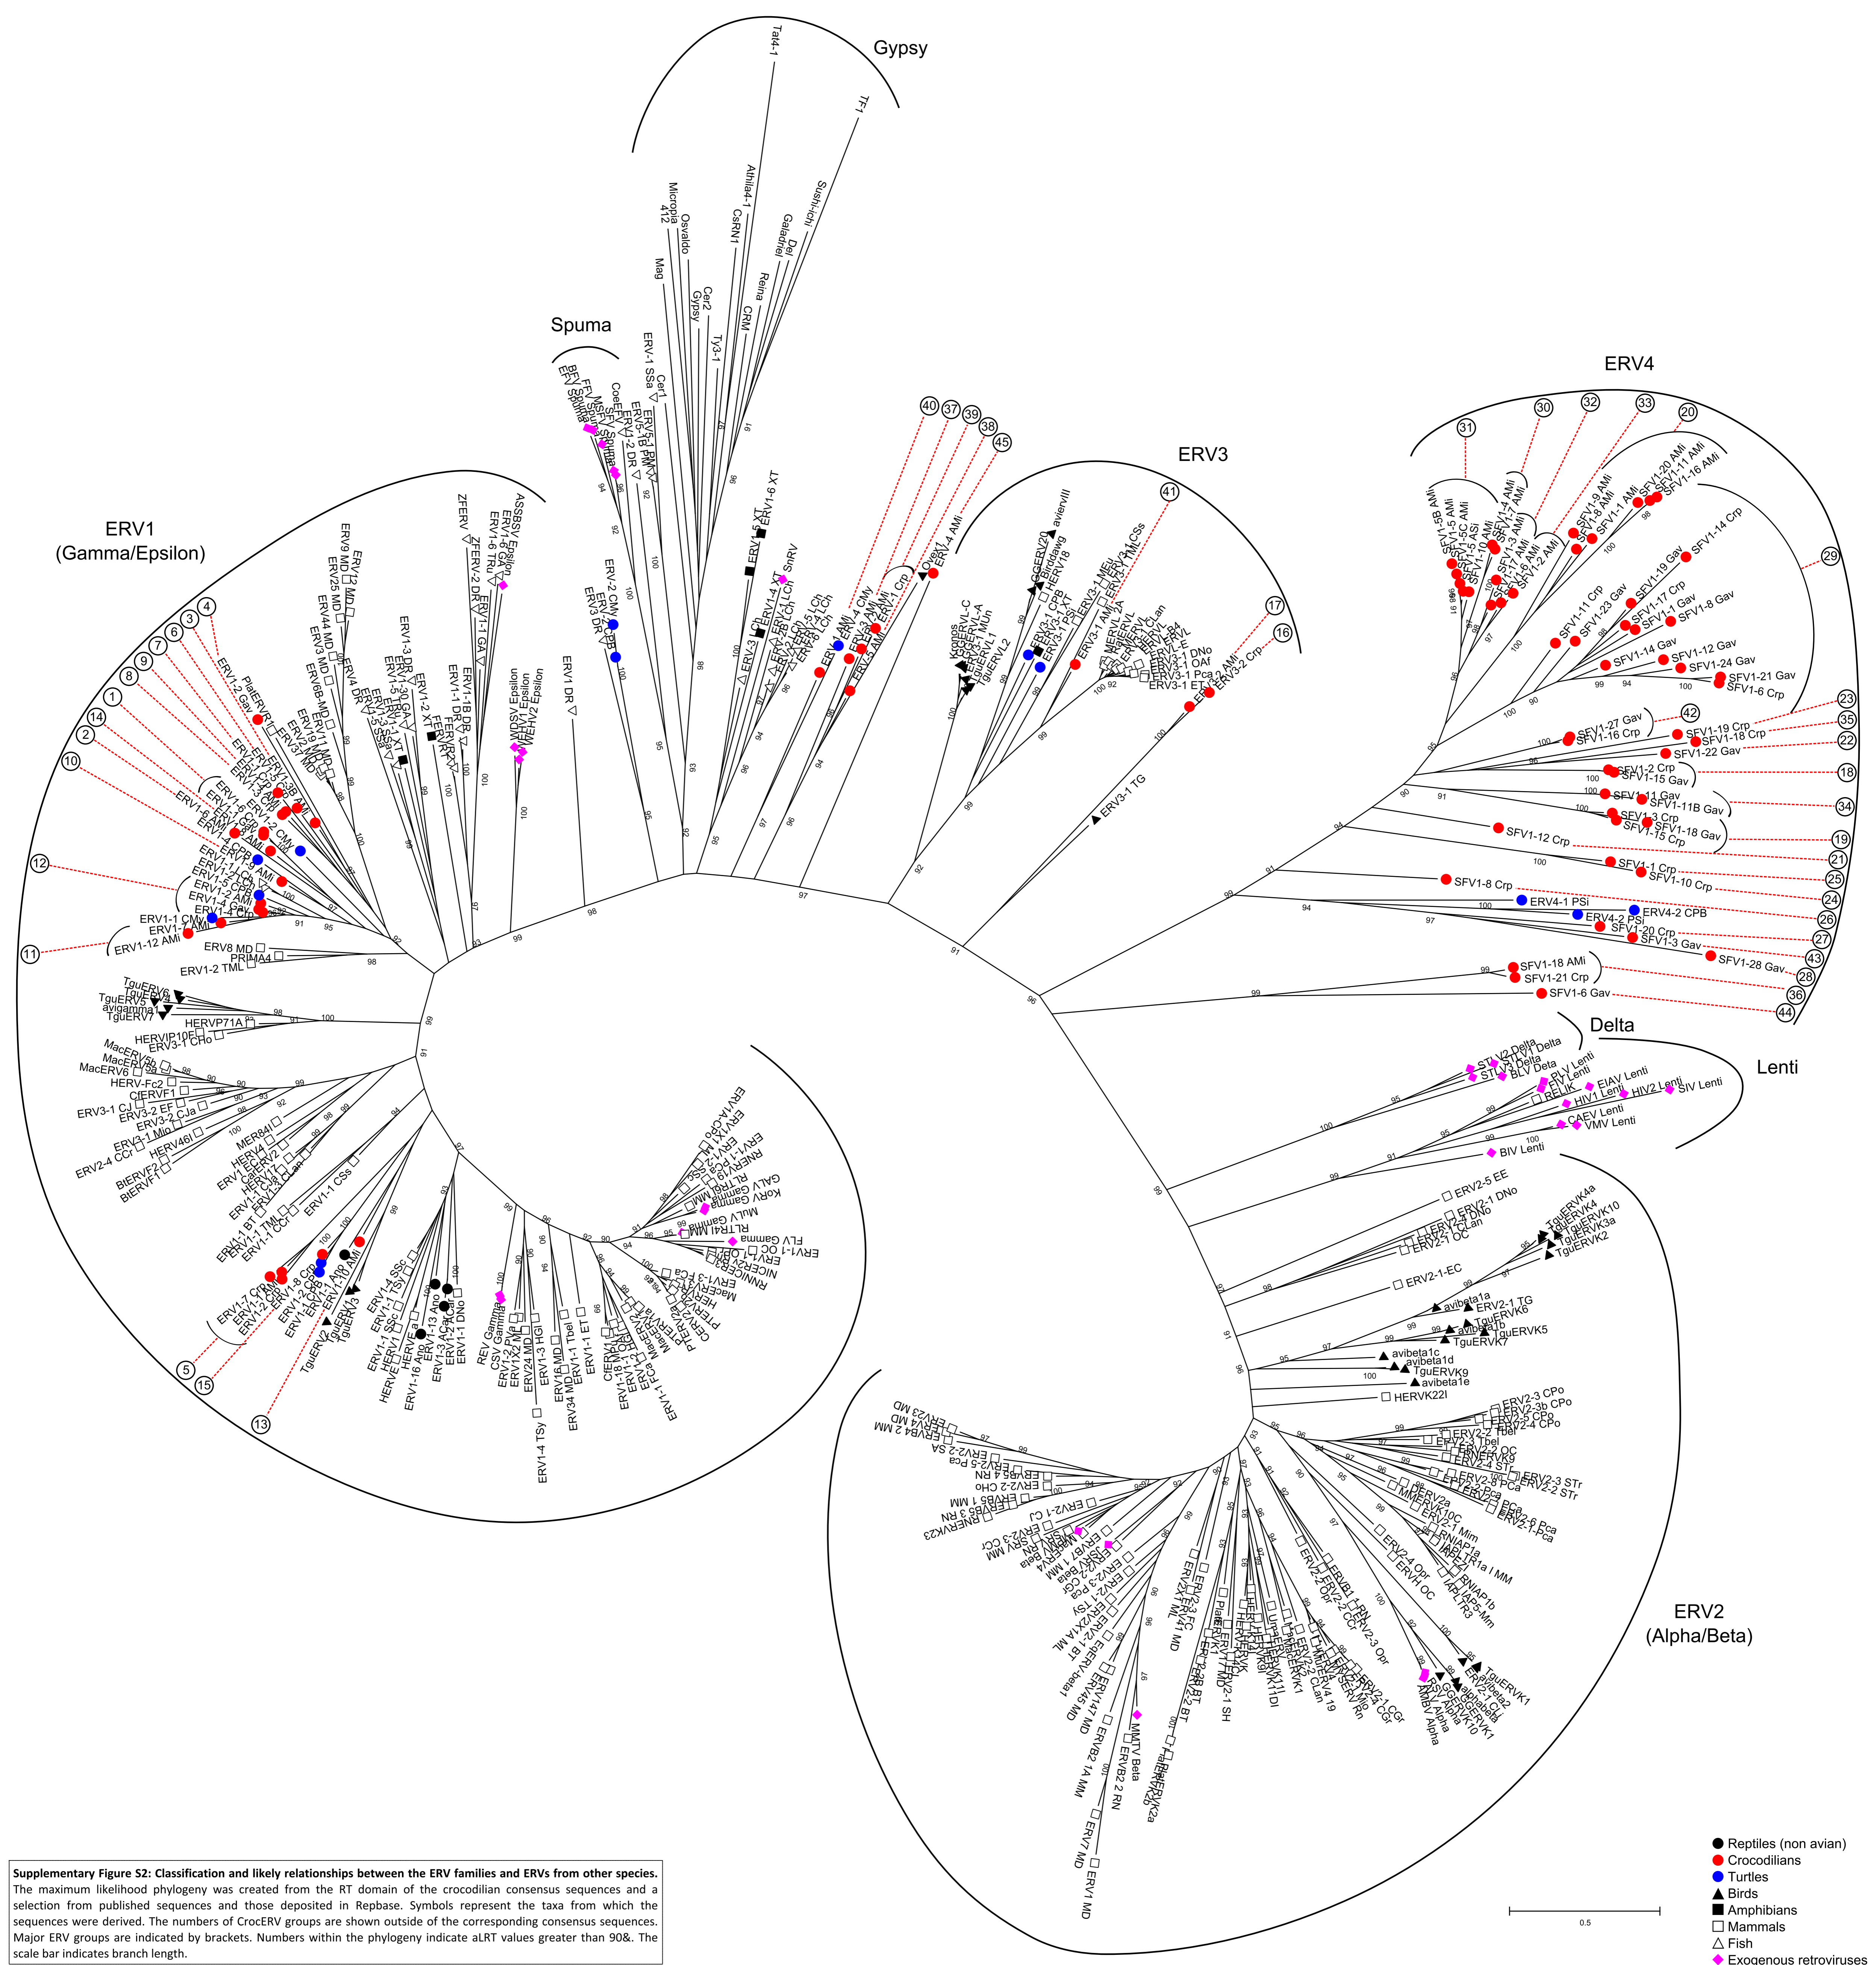

Supplement: 12977_2014_71_MOESM6_ESM.pdf [file 12977_2014_71_MOESM6_ESM.pdf]
