# Supplementary material for: Evolution and gene capture in ancient endogenous retroviruses - insights from the crocodilian genomes
Source: PubMed Central journal article supplement (PMC4299795; doi:10.1186/s12977-014-0071-2), 2014-12-12
Supplement: 12977_2014_71_MOESM7_ESM.pdf [file 12977_2014_71_MOESM7_ESM.pdf]

**Additional File 7:** KIT-ligand genes from four species of crocodilians and KIT-ligand-like sequences encoded by copies of CrocERV29.

This file contains:

- Scaffold number, exon-intron locations, cDNA sequences, and amino acid sequences of the KIT-ligand genes from *A. mississippiensis*, *A. sinensis*, *C. porosus*, and *G. gangeticus*.
- Reconstructed cDNA and amino acid sequences of the KIT-ligand-like retrocopies from CrocERV29 insertions.

## Crocodylian KIT-ligand genes

*Alligator mississippiensis*: scaffold 3372 (GenBank: JH733102)

Exon-intron structure:

|       |       |       |
|-------|-------|-------|
| Exon1 | 44030 | 44143 |
| Exon2 | 60206 | 60268 |
| Exon3 | 67304 | 67474 |
| Exon4 | 72815 | 72974 |
| Exon5 | 74407 | 74486 |

>Alligator\_mississippiensis\_cDNA

```
ACTTGGATTATCACTTGCTTTTATCTTCAGCTGCTCCTACTTAATCCACTTGTGTCAGAGCTCATAGTCCCTGTGGG
AATCCAGTGACAGATGATGTGAATGACATTACAATATTGGTTGGAAATCTTCCAAATGATTATAGGATAACCCCTT
AAATATGTCGAGAAGATGGAAAGTCTGCCTAATCACTGTTGGTTGTATTTGATGGTGCCTGAATTTTCAAAGAGT
CTGAGTAATCTGCTCCACAAATTTTACAAATATCTGATGTTTTAAGCAACCGTTCATCATCAATAATCTCACA
AGGATAATTAATGATCTTATGGAATGTCTAGCATTAGATAAAAAATAAGAATTTTAAACAAGAAAGCGATCACCTG
TATAAAGAAGGCAAGTTCATTCCCTGAGGAATTCTTTAGGCATTTTAAACAACACCATTTGAAGCCTATAAGACGTTT
TCAGAAACATCAGATTATGATGACTGTGTTCTGCCTTCAACAACAGAAACACCAGTTCATGATTCCAAGGTCACT
GAAACAAAGCCATTTTTCATTACCTCCTGTTGCTGCCAGTTCCTTAAGAATAACAATGATAGCAGT
```

>Alligator\_mississippiensis\_Protein

```
TWIIITCFYLQLLLLNPLVRAHSPCGNPVTDVNDITILVGNLPNDYRITLKYVEKMESLPNHCWLYLMVPEFSKS
LSNLLHKFSQISDVLSNRSIINNLTRIINDLMECLALDKNKNFKQESDHLKYEGKFIPEEFFRHFNNTIEAYKTF
SETSDYDDCVLPSTTETPVHDSKVTETKPFSLPPVAASSLKNNDSS
```

*Alligator sinensis*: scaffold1076

Exon-intron structure:

|       |        |        |
|-------|--------|--------|
| Exon1 | 410510 | 410397 |
| Exon2 | 393466 | 393404 |
| Exon3 | 386288 | 386118 |
| Exon4 | 380775 | 380613 |
| Exon5 | 379189 | 379110 |

>Alligator\_sinensis\_cDNA

```
ACTTGGATTATCACTTGCTTTTATCTTCAGCTGCTCCTACTTAATCCACTTGTGTCAGAGCTCATAGTCCCTGTGGG
AATCCAGTGACAGATGATGTGAATGACATTACAATATTGGTTGGAAATCTTCCAAATGATTATAGGATAACCCCTT
AAATATGTCGAGAAGATGGAAAGTCTGCCTAATCACTGTTGGTTGTATTTGATGGTGCCTGAATTTTCAAAGAGT
CTGAGTAATCTGCTCCACAAATTTTACAAATATCTGATGTTTTAAGCAACCGTTCATCATCAATAATCTCACA
AGGATAATTAATGATCTTATGGAATGTCTAGCATTAGATAAAAAATAAGAATTTTAAACAAGAAAGCGATCACCTG
TATAAAGAAGGCAAGTTCATTCCCTGAGGAATTCTTTAGGCATTTTAAACAACACCATTTGAAGCCTATAAGACGTTT
TCAGAAACATCAGATTATGATGACTGTGTTCTGCCTTCAACAACAGAAACACCAGTTCATGATTCCAAGGTCACT
GAAACAAAGCCATTTTTCATTACCTCCTGTTGCTGCCAGTTCCTTAAGAATAACAATGATAGCAGT
```

>Alligator\_sinensis\_Protein

```
TWIIITCFYLQLLLLNPLVRAHSPCGNPVTDVNDITILVGNLPNDYRITLKYVEKMESLPNHCWLYLMVPEFSKS
LSNLLHKFSQISDVLSNRSIINNLTRIINDLMECLALDKNKNFKQESDHLKYEGKFIPEEFFRHFNNTIEAYKTF
SETSDYDDCVLPSTTETPVHDSKVTETKPFSLPPVAASSLKNNDSS
```

*Crocodylus porosus*: scaffold-17042

Exon-intron structure:

|       |       |       |
|-------|-------|-------|
| Exon1 | 21310 | 21423 |
| Exon2 | 48730 | 48792 |
| Exon3 | 55257 | 55427 |
| Exon4 | 60678 | 60840 |
| Exon5 | 64671 | 64750 |

>*Crocodylus porosus*\_cDNA

```
ACTTGGATTATCACTTGCTTTTATCTTCAGCTGCTCCTACTTAATCCACTTGTGTCAGAGCTCATAGACCCTGTGAG
AATCCAGTGACAGATGATGTGAATGACATTCCAAAATTGGTTGGAAATCTTCCAAATGATTATAGGATAACCCTT
AAATATGTCGAGAAGATGGAAAGTCTGCCTAATCATTGTTGGTTGCATTTGATGGTGCCTGAATTTTCAAAGAGT
CTGAATAATTTGCTCCACAAATTTTCACAAATATCTGAAGCTTTAAGCAACCACTCAATCATCAATAATCTCACA
AGGATAATTAATGATCTTATGGAATGTCTAGCATCAGATAAAAAATAAGAATTTTAAAAAAGAAAGCGACCACCTC
TATAAAGAAGGCAAGTTCATTCCCTGAGGAATTCTTTAGGCATTTTAAACAACATCATGGAAGCCTTTAAGACATTT
TCAGAAATATCAGATTATGATGACTGTGTTCTGCCTTCAACAACAGAAACACCACTTAATGATTCCAAGGTCACT
GAAACAAAGCCATTTTCATTACCTCCTGTTGCTGCCAGTTCCTTAAGAATAACAATGATAGCAGT
```

>*Crocodylus porosus*\_Protein

```
TWIIITCFYLQLLLLNLVRAHRPCENPVTDDVNDIPKLVGNLNDYRITLKYVEKMESLPNHCWLHLMVPEFSKS
LNNLLHKFSQISEALSNSIINNLTRIINDLMECLASDKNKNFKKESDHLKYEGKFIPEEFFRHFNNIIEAFKTF
SEISDYDDCVLPSTTETPLNDSKVTETKPFSLPPVAASSLKNNNDSS
```

*Gavialis gangeticus*: scaffold4318

Exon-intron structure

|       |        |        |
|-------|--------|--------|
| Exon1 | 102637 | 102524 |
| Exon2 | 85583  | 85521  |
| Exon3 | 66992  | 66822  |
| Exon4 | 61638  | 61476  |
| Exon5 | 60032  | 59953  |

>*Gavialis gangeticus*\_cDNA

```
ACTTGGATTATCACTTGCTTTTATCTTCAGCTGCTCCTACTTAATCCACTTGTGTCAGAGCTCAGCGTCGCTGTGAG
AATCCAGTGACAGATGATGTGAATGACATTCCAAAATTGGTTGGAAATCTTCCAAATGATTATAGGATAACCCTT
AAATATGTCGAGAAGATGGAAAGTCTGCCTAATCACTGTTGGTTGCATTTGATGGTGCCTGAATTTTCAAAGAGT
CTGAATAATTTGCTCCACAAATTTTCACAAATATCTGAAGCTTTAAGCAACCACTCAATCATCAATAATCTCACA
AGGATAATTAATGATCTTATAGAATGTCTAGCATCAGATAAAAAATAAGAATTTTAAAGAAGAAAGCGACCACCTC
TATAAAGAAGACAAGTTCATTCCCTGAGGAATTCTTTAGGCATTTTAAACAACATCATGGAAGCCTTTAAGACATTT
TCAGAAATATCAGATTATGATGACTGTGTTCTGCCTTCAACAACAGAAACACCACTTAATGATTCTAAGGTCACT
GAAACAAAGCCATTTTCATTACCTCCTGTTGCTGCCAGTTCCTTAAGAATAACAATGATAGCAGT
```

>*Gavialis gangeticus*\_Protein

```
TWIIITCFYLQLLLLNLVRAQRRCENPVTDDVNDIPKLVGNLNDYRITLKYVEKMESLPNHCWLHLMVPEFSKS
LNNLLHKFSQISEALSNSIINNLTRIINDLIECLASDKNKNFKKESDHLKYEDKFIPEEFFRHFNNIIEAFKTF
SEISDYDDCVLPSTTETPLNDSKVTETKPFSLPPVAASSLKNNNDSS
```

## Nucleotide sequences of KIT-ligand retrocopies from CrocERV29

Sequences labeled “Cpor” are from *C. porosus*, “Ggan” are from *G. gangeticus*. The scaffold location is included within square brackets. Where the surrounding ERV insertions are relatively conserved, the name of the associated ERV sequence has also been provided.

>Cpor-scaffold-13420\_[94543-93962];Crpo-13420-P00001  
ATGATATCAACCACAAAATTGATCTGGATTGTCGCTCTCTTTGCGTTTGTACTACTGCTGCTTCTCGCCCG  
TGCGAAAATCCACTGACAGATGACGTCGATGACATCCCAAAATTGATTAAAAATCTTCCACACAATTATAAGATA  
ACCCTTAAATATGTCAATAAAAATGGAACATCTACACAATCATTGTTGGCTACATTTGATGGTGCCTCAATTCGCA  
AAGAGCCTGAACAACCTTGCTCCACAAATTTCCACAAACATTTGACGTGTCAAAAACTACTCAATCCTCAACAGT  
CTTACCAGAATGATTAACGATCTTCTAGAATGCCTCACATCAGACGGGCATAAAATACAGCATTCATTCCTATAAAA  
GAAAGTGAATTCAGTCCTGAGGAATTTCTTTAACCATTTCAATAATATGATTGAGGTCTTTAAGGCATTTTCAACA  
ATACCGGCATATGACAATTGCGCCCCACGTTTTACGATGCAATATTCACAAGTCACCAAAACAAAGCTATCTTTT  
CTACCTCTGTCACTACTCCTTCCCTTACAACGATACTGATAAAACT

>Cpor-scaffold-3177\_[176589-176029];Crpo-3177\_2-S00001  
ATGACACCGACTGAGAATCTGACTTGGATTATTCTGCTCTACTTAATCCACTTGTGAGAGCTCATAGACCGTGT  
GAGAATCCAGTGACAGATGATGTGAATGATATCCCAAAATTGATTGAAAATCTTCCAAATGATTATAGGATAACC  
CTTAAATATATCAAGAAGATGGAAAGTCTGCCTAATCATTGTTGGTTGCATTTGATGGTACCTGAATTTTCAAAG  
AGTCTGAATAATTGCTCCACAAAATTTTCAAAAATATCTGAAGCTTTAAGCAACCACTCAATCAGTAATAGTCTC  
GCAAGGATAATGAACGATCTTATGGAATGTCTAGCATCAGATAAAAAATAAGAACTTTAAAAGAGAAAGCAACCAC  
CCCTATAAAGAAGGCGAGTTCATTCTGAAGAATTTCTTAGGCATTTTAAACAACATCGAGGCCTTTAAAGATGTTT  
TCAAATTATGACGACTGTGTTCTGCCTTCAACAACAGGAACCACTTAATGATTCCAAAGTCACTGAAACAAAG  
CCACTTTCATTGCAAGGAAGCCAGAGA

>Cpor-scaffold-5217\_[4839-4289];Crpo-5217-S00001  
ATGTCTACCATAAGACTTACTTGGGTTATTACTCTCTTTGCGCTTAATCTACTTCCCCTACTTCTAATCCATGC  
GGAAATCCAGTGACAGATGACGTCAGGATATTCCAAAATTAATTAATAAATCTCCCAAGTGATTATAAGATAACC  
CTCCAATATGTAAACCGATCGGAACTTCTACACAATCATTGCTGGCTACACTTGATGCTGCCTCACTTCGCTACA  
AGTTTGAACAATTTACTCTATAAATTTCCACAAAATCTGACAACACTACTTGATCCTCAACAGCCTCACCAGGATC  
ATTCACGATATTCTAGAATGCCTCACGTCGGATGTATACGGTGTTCATTACGATGACCAATGTGACTTCAGTCCT  
GAAGAATCTTTGCCCACTTCAATCTTATACTTGAGTCTTCAAGGCATCTTCAATGATACCGACATCTGATTGC  
GTCCCCTCTTACGACACAGAATTTACAACACTCACTGAAACAAAGCTACCTCCTGTTGTTACTCCTTCTGTCCCT  
AACGATTATGATTA

>Cpor-scaffold-5863\_[7253-7796];Crpo-5863-P00001  
ATGATCATAACAACCTCACCTGGATCGTTACCTTCTTACGCTCCGTCCTACTTCCCCTACTTCCACATCCATGCGGA  
AACTCCCTAATGGACGACGTTGAGGATATTCCGAAAATTGATTGAAGGCCTTCCATGCGATTATAACAATAACTCTC  
CGATATGTGAATCAAACGGTACCTCTACATGATCATTGCTGGGTTGCTTGTGATGATACCTCATTGCGACAAGC  
CTGAGCAACCTGCTCTACAACCTTTCCACCAATGTCTCATAACTATGTCATCCTCAATAGCCTCGCCAGGATGACC  
CACAATCTTATGGAATGCCTCGCACCAGATACATAACAATATTCATCCTTATGAAAAACATAAAATACAGTCTGAG  
CGATATTTGCCCCACTTCAACGATATGGTTGACATCCTCAAAACGTCTTCAACGACACCGCCGAACAACCTGCGCT  
TCAGTCTTACCACACATTTACAACCTCGCCAAAACAGAGCTACCTCCTGTTGTTACTTCTCTATTCTAAATAAT  
TATG

>Ggan-scaffold-21115\_[31040-30411];Gaga-21115-P00001  
ATGACACCAACTAAAAATTGGATTTGGATTATCACTCTCTTCGTGCTTGTACTACTTACCGCTGCTTATAGGCAG  
TGCGAGAATTCAGTGACAGATGACGTTGGATAACATCCAGAATTGATTAAAAATCTTCCAACCGATTACAAAATA  
ACCCTTAAATACATCAATGAGATGAGATATATCCACAAACATTTGTTGGTTGCATTTGATGGTACCTGAATTTGCA  
AAGAGCCTGAACAACCTTGCTCCACAAATTTCCACGAACATCTAGTGCCTCAAAACCACTCAATCCTCAACAGT  
CTCACAGAGTGATTGACGATTTTCTAGAATGCCTCAGTCAGTCAACGACCAACATGCGAACTTTAAAAAAGAAAGTAC  
CATTCTTATGCCGAAAGTGAATTCAGTCTGAGGAATTTCTCAAGCAACTTAACAACATGATTGAAACCTTTAAG  
GTGTTTTCAAAAATACTGGAGTATGATAACTGTGTTTTGTTTTCAACAACGGCAGCCCGTTCACTGCCTCCGAG  
GTCACTGGAACAGAACCACCTTATCCACCACCTCCTGTCGCCACCCGTTCCCTCAAAAAGGATTATCTACAAGAG  
ACAGATGTAATGCTATCACCT

>Ggan-scaffold-8307\_[28177-27575];Gaga-8307-S00001  
ATGATACCGACCAAAAATTGGATTTGGATTATCACTCTTTTCGTGCTTGTACTACTTACCGCTGCTTATAGGCCG  
TGCGAGAATCCACTGACAGATGACGTTGGATGACATCCAGAATTGATTAAAAATCTTCCAACCGATTATAAAAATA

ACCCTTAAATATGTCAATGAGATGGGATATATCCACAAGCATTGTTGGCTGCATTTGATGGTACTTGAATTTGCA  
AAGAGCCTGAACAACCTTGCTCCACAAATTTCCACGAACATCTAGCGCGTCAAAAAACCACTCAATCCTCAACAGT  
CTCACACGAATGGTTGACAACTTCTAGAATACCTCACGTTGGATCAACAAAAGAACCTTTAAAAAACAAAGTGAC  
TATTCCTACGCAGAAAATGAATTCAGTCCTAAGGAATTCCTCAAACAACCTTAACAACATGATTGAAACCTTTAAG  
GTGTTTTCAAAAATACCGGAGTATGATAACTGCGTTTTCTCTTCAACAACGGGAGCCCTGTGTAATGCTTCCGAG  
GTCACTGAAACAGAACTACCTTATCCACCACCTCCTGTGCGCCACTCGTTCCCTCAAAAACGATTACCTA

>Ggan-scaffold-886\_[32021-32683];Gaga-886-P00001

ATGACACCGACCAAAAACCTTAATTTGGATTGTCACCTTCTTTACGCTTGATCTACTTACTGCTGCTTATAGACTG  
TGCGAGAATTCACTGACAGATGACGTCGATAACATCCCAGAATTGATTAAAAATCTTCCGAGCGATTATAGGATA  
ACCCTTAAATATGTCCATAAAGTGGAACACGTACACAATCATTGCTGGTTACATTTGATGGTACCCGAGTTTGCA  
AAGAGCTTGAATAAECTTACTCCACAAATTTCCAAGAACATCTGACGCTCAGACAACCACTCAATCCTAAACAGC  
CTCACCAGAATGATTAACGATCTTCTGGAATGCCTCACATCAGACAGATATAAAGACAGCGTCCATTCCTATCAA  
GAAAGTGAATTCAGTCCCAAGGAATTCCTTTAAACATTTCAATAATATGATTAAGATCTTTAAGGCATTTTCAACA  
ATACCGGCGGATGATAATTGCGATCTGTTCTCCACAACGCCAACCTGCTTAACGATTCAAAAGTCACCTGATCCA  
CCTCCTGTCGTTAAAAGTGCCCAAGATACTACCAGTTCTCACCTACAAACAATGAATGTCACGTCATCATCTACA  
CCCAAGACGAGAAGCTCGAACTTCCACCAGCTAGAAGAAAACCCGCTCAAGAG

>Ggan-scaffold-7393\_[60286-59624];Gaga-7393-S00001

ATGACACTGACTAAAAACCTTAATTTGGATTGTCACCTCTTTCATGCTTGATCTACTTACCGCTGCTTATAGACCG  
TGCGAGAATTCACTGACCGATGACATCGATAACATCCCAGAATTGATTAAAAATCTTCCGAGAAATTATAGGATA  
ACCCTTAAATATGTTTCATAAAGTGGAACACATACACAATCATTGCTGGTTAGATTTGATGGTACCCAAGTTTGTA  
AAGAGTTTGAATAGCTTACTCCACAAATTTCCAAAAACATCTGACGCTCAGACAACCACTCAATCCTAAACAGC  
CTCACCAGAATGATTAACGATCTTTGGGAATGCCTCACATCAGACGGATATAAAGACAGCATCCATTCCTATCAA  
GAAAGTGAATTCAGTCCCAGGAATTCCTTTAAACATTTCAATAATATGATTAAGATCTTTAAGGCATTTTCAACA  
ATACCGGTGGATGATAATTGTGATCTGTTCTCCACGATGCAAACCTGCTTAACGATTCAAAAGTCACCTGATCCA  
CCTCCTGTCGTTAAAAGTACCCAAGATACTACCAGTTCTCACCTACGAACGATGAATGTCACGTCATCATCTACA  
CTGAAAAATGAGAAGCTCGAACTTCCACCAGCTGGAACAAAACCACTCAAGAG

>Ggan-scaffold-7308\_[209878-210558]

ATGACACTGACCGAGAGTCTAGTTTGGATTATCACGTGCTTTTATCTTCAGCTGCTCCTACTTAAATCCGCTTGTC  
AGAGCTCGTAAACCATGCGAGAATCCAGTGACAGATGATGTGAATGACATCCCAAAATGATTAGGAATCTTCCA  
AATGATTATAGGATAACCCTTAAATATGTCAAGAAGATGGAAAAGTCTACCTAATCATTGTTGGTTGCATTTGATG  
GTACCCAAATTTTCAAAGAGTCTAAACAATTTGCTCCACAAATTTTTCACAGATATCTGAAGCTTTAAGCAACCAC  
TCAATCATAAATAGTCTCACGAGGATAATTAATGATCTTATAGAATGTCTAGCAACAGATAAAAAATAAGGACTTT  
AAAAGAGAAAAGCGACCACCCCTATGAAGAAGGCGAATTCATTCTGAAAGATTTTTTTGGCATTTTAATAACATC  
ATTAAGCCTTTAAGATGTTTTTCAGAGATATCGGATTATGATGACTATGTTCTGCCTCCAACAACAGAAACGAAG  
CCACTTTCATTACCTCCTGTTACTGTGTCAGTTCCCTTAGGAAAAGCAATGATAGCAGTGTCCAGGACACTAGCAAC  
TCCAGCCTGCAAGAGACCAGTGTAGCATGACCATCTAAACCAGAAAAGTGAAGAACCTGAAGGGGGTAGTGAC

## Protein sequences of KIT-ligand retrocopies from CrocERV29

>Cpor-scaffold-13420\_[94543-93962];Crpo-13420-P00001  
MISTTKLIWIVALFAFDLLTAASRPCENPLTDDVDDIPKLIKLNLPNYKITLKYVKNKMEHLHNHCWLHLMVQPFA  
KSLNNLLHKFPQTDFVSKNYSILNSLTRMINDLLECLTSDGHKYSIHSYKESEFSPEEFFNHFNNMIEVFKAFST  
IPAYDNCAPRFTMQYSQVTKTKLSFLPPVITPSLHNDTDKT

>Cpor-scaffold-3177\_[176589-176029];Crpo-3177\_2-S00001  
MTPTENLTWIIILLLLNLPLVRAHRPCENPVTDDVNDIPKLIENLPNDYRITLKYIKKMESLPNHCWLHLMVPEFSK  
SLNNSLHKFSQISEALSNHSISNSLARIMNDLMECLASDKNKNFKRESNHPYKEGEFIPPEFFRHFNNIEAFKMF  
SNYDDCVLPSTTGTPLNDSKVTETKPLSLQGSQR

>Cpor-scaffold-5217\_[4839-4289];Crpo-5217-S00001  
MSTIRLTWVITLTFALNLLPATSNPCGNPVTDDVVDIPKLIKLNLPDYKITLQYVNRSELLHNHCWLHLMPLPHFAT  
SLNNSLKYKFPQTSNYLILNSLTRIHDILECLTSDVYGVHYDDQCDFSPPEEFFAHFNLIILEFFKASSMIPTSDC  
VPLLTQNLQLTETKLPVVTSPVSLNDYD

>Cpor-scaffold-5863\_[7253-7796];Crpo-5863-P00001  
MIIQLTWIVTFLTLRPLPATSHPCGNSLMDDVEDIPKLIIEGLPCDYTITLRYVNQTVPLHDHCWVRLMIPHFATS  
LSNLLYNFPPMSHNYVILNSLARMTHNLMECLAPDTYNIHPYEKHKYSPERYFAHFNDMVDILKTSSTTPPNNCA  
SVLTTHLQLAKTELPPVVTSSILNNY

>Ggan-scaffold-21115\_[31040-30411];Gaga-21115-P00001  
MTPTKNWIWIITLFLVLDLLTAAYRQCENSLTDDVDNIPELIKLNLPDYKITLKYINEMRYIHKHCWLHLMVPEFA  
KSLNNLLHKFPRTSSASNNHSILNSLTRVIDDFLECLTSDQHANKKESDHSYAESEFSPEEFFKQLNNMIETFK  
VFSKILEYDNCVLFSTTAAPFTASEVTGTEPPYPPPPVATRSLKKDYLQETDVMLSP

>Ggan-scaffold-8307\_[28177-27575];Gaga-8307-S00001  
MIPTKNWIWIITLFLVDPLTAAYRPCENPLTDDVDDIPELIKLNLPNDYKITLKYVNEMGYIHKHCWLHLMVLEFA  
KSLNNLLHKFPRTSSASKNHSILNSLTRMVDKLELYLTDQQKNFKKQSDYSYAENEFSKPEFFKQLNNMIETFK  
VFSKIPEYDNCVFSSTTEALCNASEVTETELPYPPPPVATRSLKNDYL

>Ggan-scaffold-886\_[32021-32683];Gaga-886-P00001  
MTPTKNLIWIVTFFTLDDLTAAYRLCENSLTDDVDNIPELIKLNLPDYRITLKYVHKVEHVHNHCWLHLMVPEFA  
KSLNNLLHKFPRTSDASDNHSILNSLTRMINDLLECLTSDRYKDSVHSYQSESEFSKPEFFKHFNNMIKIFKAFST  
IPADDNCDLFFSTPTLLNDSKVTDPPPVVKSAQDTTSSHLQTMNVTSSSTPKDEKLELPPARRKPAQE

>Ggan-scaffold-7393\_[60286-59624];Gaga-7393-S00001  
MTLTKNLIWIVTFLFMLDLLTAAYRPCENSLTDDIDNIPELIKLNLPNYRITLKYVHKVEHIHNHCWLDLMPKVF  
KSLNSLLHKFPKTSASDNHSILNSLTRMINDLWECLTSDGYKDSIHSYQSESEFSPEEFFKHFNNMIKIFKAFSA  
IPVDDNCDLFFSTMQTLNDSKVTDPPPVVKSTQDTTSSHLRTMNVTSSTLKNEKLELPPAGTKTTQE

>Ggan-scaffold-7308\_[209878-210558]  
MTLTESLVWIIITCFYLQLLLLNPLVRAHRPCENPVTDDVNDIPKLIERNLPNDYRITLKYVKKMESLPNHCWLHLM  
VPKFSKSLNNSLHKFSQISEALSNHSIINSLTRIINDLIECLATDKNKDFKRESHPYEEGEFIPPEFFWHFNNI  
IKAFKMFSEISDYDDYVLPPTTETKPLSLPPVTVSSLRKSNDSVQDTSNSSLQETSVA
