# Supplementary material for: Evolution and gene capture in ancient endogenous retroviruses - insights from the crocodilian genomes
Source: PubMed Central journal article supplement (PMC4299795; doi:10.1186/s12977-014-0071-2), 2014-12-12
Supplement: 12977_2014_71_MOESM8_ESM.pdf [file 12977_2014_71_MOESM8_ESM.pdf]

**Additional File 8:** Nectin3 genes from *A. sinensis* and nectin3-like sequences encoded by copies of CrocERV31.

This file contains:

- Scaffold number, exon-intron locations, cDNA sequence, and amino acid sequence of the nectin3 gene from *A. sinensis*.
- Reconstructed cDNA and amino acid sequences of the nectin3-like retrocopies from CrocERV31 insertions.

## ***A. sinensis* nectin3 gene**

Scaffold359

Exon-intron structure:

|       |        |        |
|-------|--------|--------|
| Exon1 | 957523 | 957185 |
| Exon2 | 950794 | 950498 |
| Exon3 | 947952 | 947835 |
| Exon4 | 944216 | 944065 |
| Exon5 | 927690 | 927101 |

>Alligator\_sinensis\_cDNA

```
GTGCCTTAGCTGGACCGATTGTTGATCCACACGTAACAGCAGTCTGGGGGAAGAATGTCACGTTAAAATGCATAA
TTGATATAAATGAAACAATAACACAAATCTCATGGGAGAAGATACATGGTAAAAGTGCACAAACTGTTGTTGTTTC
ATCATCCTGAATATGGGTTTTCTGTTCAAAGAGAATACCATGGAAGAGTGTCAATTTAAAACTCTTCGCTCATTG
ATGCAACAATCAGCCTAAACAATGTGAGCTTCTCTGATGCAGGAGAGTACGTATGCAAAGCAGTTACATTCCCAC
TAGGAAATGCACAGTCGTCAACAACCTGTAACCTGTATTTGTTGAACCCACTGTGAGCCTTGCAAAGGGACCAAAC
CTTTAATAGATGGTGAAAATCAGACAGTAGCAGCCATTTGTACAGCAGCCACTGGGAAACCTGCTGCAGATGTTG
ATTGGGAAGGAGGCCTTGGTGAAAATGGAATCTATTTCAACTTCCTTTCCAAATGAAACAGTGACAGTTGTAAGTC
AATATAAAATCATTCCTACCAGATTTGCAAGAGGGAAGACGTATAACTTGTGTTGTAAGCAGCCAGCTTTGGAAA
AGGAGATAAGATATTCTTACGTGCTGGACATCCAATATGCCCTGAAGTTTCAGTGACTGGCTATGATGGAAATT
GGTTCATTGGAAGAGGGAATGTTCAACTTAGGTGCAATGCTGATTTCAATCCACTACCTATGGAATTTACCTGGA
CCAGGCTGGATGGGCAATGGCCTGAAGGCTTACTGTCTATAAAACAATACTCTGCATTTCAACAGCCCACTAACTT
ACAATTACACTGGGACTTACATCTGTAGGGTGACAAATTCCTTGGTCAAAGAAGCGATCAAAAAGACTATCTACA
TATTAGATCCTCCTACTACTACCACACGACCACCCACGGTTCATGGCATCCTTCAACTGATGGCATCACAGGTT
TAGCAACAGAACCTAAACTAATATATATTTTCCAACATCAACCTTGCCAGCAATGCAGGAAGACAATTGGGGTACCA
TCATCGGTAGTGCAGTGGGTGGGGCTCTCTTCCCTGATACTTGTAAGCATTTTGGTTGGAGTTGTCTGCTATAGGA
GAAGACGGACGTTCCGTGGTGACTACTTTGCTAAGAACTACATTCGCCCAACTGATATGCAAAAAGAGTCTCAA
TAGATGTTCTCCAGTCAGATGATGTGGATTCTTACCCTGACAGTGTAAGAAAAAGAAATAAAGCATCCAATGAACA
GTCTGATATCTAAAGACTATTTAGAAGACCCTGAAAAGCCAGAGTGGAAACAATGTAGGCAATATTAACAGGTACC
AGGAACGGTATGAAAGACCAATGGATTATTATGAAAGTGGAACTGCGGATGAAATATATGGGTAGCGAATGTT
ATGATGACAATGAAGAAGACTTTGTTTCCCATGTAGATGGCTCAGTAATATCCCGAAGGGAGTGGTATGTG
```

>Alligator\_sinensis\_Protein

```
ALAGPIVDPHVTAVWGKNVTLKCIIDINETITQISWEKIHGKSAQTVVVHHPEYGFVSVQREYHGRVSVFKNSSLID
ATISLNNVSFSDAGEYVCKAVTFPLGNAQSSTTVTVFVEPTVSLAKGPNSLIDGENQTVAAICTAATGKPAADVD
WEGGLGEMESISSTSFNETVTVVSQYKIIPTRFARGRRITCVVKHPALEKEIRYSYVLDIQYAPEVSVTGYDGNW
FIGRGNVQLRCNADSNPLPMEFTWTRLDGQWPEGLLSINNTLHFNSPLTYNYTGTYICRVNLSLGQRSDQKTIYI
LDPPTTTTRPPTVPWHPSTDGITGLATEPKLIYFPTSTLPAMQEDNWGTIIGSAVGGALFLILVSVILVGVVVCYRR
RRTFRGDYFAKNYIPPTDMQKESQIDVLQSDVDVSDYVPSVKKEIKHPMNSLISKDYLEDPEKPEWNNVGNINRYQ
ERYERPMDYYESGLTGMKYMGSECYDDNEEDFVSHVDGSVISRREWYV
```

## Nucleotide sequences of nectin3 retrocopies from CrocERV31

All sequences were derived from *A. mississippiensis* ERV insertions, as this family appears to be species specific. Where the surrounding ERV insertions are relatively conserved, the name of the associated ERV sequence has also been provided.

>Amis-scaffold-8548\_[AKHW01073359:7304-8593];Almi-JH736268-P00001  
ATGGCTGCCGCAGGGGCACCGAGGCGGCGACGTCCGCCGGGTTAGAGCTCGCTCTGGCACTGCTCCTTTCCCAT  
TTCTGCTGTGGTACATTGATTAGACCGATTGTTGATCCACACGTAACAGCAGTTTGGGAAAGAATGTCACATTA  
AAATGCATAATTGATATAAAGGGAACAATAATACAAATTTACAGGAAAAATATATGGTAAAAGTGCACAAACT  
GTTGTTGTATATCATCCTGAATATGGGTTTTCTTTTCAAAGAGAATACCATGGAAGAGTGTCAATTTAAAACTCT  
TCACCCACTGATGCAACAATCAGACTAAACAATGTGAGCTTCTCTGATGCAGGAGAGTATGTATGTAAAATAGTT  
ACATTTCCCACTAGGAAATGCACAGTCGTCAACAACCTGTAACCTGTATTTGTTGAACCCACTGTGAGCTTTATAAAG  
GGACCAAAATCTTTAATAGATGGTGAAAATCAGACAGTAGCAGCCATTTGTACAGCAGCCACTGGGAAACCTGCT  
GCAGATATTGATTGGGAAGGAGACCTTGGCGAAAATGGAGTTTAGTTTAACTTCCCTTTCCAAATAAAATGGCGACA  
GTTGTAAGTCAATATAAAATCATTCTACCAGATTTGCCAGAGGAANACGTATAACTTGTGTCTGTAAGCACC  
GCTTTGGACAAGGAAACAAGATACTCTTGGCTACTGGACATTCATATGTCCCTGAAGTTTCAGNACTGGCTAT  
GACAGAAATTTGGTTATTGGAAGAGAGAATGTTGAGCTTAGGTGCAATGCTGCTTCTAATCTCCACCTATNGAA  
TTTGGCTGGACAGGACTAGATAGGCAATGGCCTGAAAGCTTACTGTCTGTAAACAATACTCTCCAAATAGC  
CCACTAACCTACAATTACGCTGGGACTTACATCTGTAGGGTGACAAAATTCCTTGGTCAAGGAAGTATCAAAAAG  
ACTATCCACATATTAGATCCTCTTATTACTATCACACGACCACCCACTGTTCCATGGCATCCTTCAACTAATAGC  
ATCATAGGTTTAGCACCAGCATTAACCTTGCCAGCAATGCAGGAAGACAATCGGGGTACCATCATCGGTAGTGCG  
GTTGGTGGAAACCCTCTTCTGGTATTTGCAAGTATTTGGCTGGAGTTATCTGCTATGGGAGAAGACGAACGTTT  
CGTGGTAACTATTTCTGTTGAGAACTACATTCCTGCAACTGATGTAGAAAAGGAGTCCCAAATAGATGTTCCCCAG  
TCAGATGATGACCAA

>Amis-scaffold-1726\_[AKHW01016010:574-1860];Almi-JH732083\_6-P00001  
ATGGCCATGGAGAGGGCACCGAGGCAACAAATATCCGTCGGGTCAAACCTCGCTCTAATGCTGCTTCTCTCAT  
TTCTGCTGCAGTGTATTAGTTAGACCTGTGCTTGATCCGTACGTAACAGCAGTTTGGGAAAGAATGTCACATTA  
AAGTGTATAATTAATATAAATGACACCATAATACAGGTTTTCATGGGAAAAGATATATGATAAAAAGTGCACAACT  
ATTGTTGTGCATTGTCTGAATATGGGGTCTCTATTCAAAGAAAATACCATGGGAGGGTGTATCCAGAAGTTCT  
TTGCCATTGATGCGACGATCAGTCTGCATAATGTGAGTTTCTATGATGAAGGAAAGTATAAATGCAAAGTAACT  
ACATTTCCCACTGGGAAATACACAATCATTAAACAATTTGTAACCTGTACTTGTAAAGCCACTGTAAGTTTCAACAAG  
GAGCCAAATTTCTTAATAGATGATGGAAAGTGGACAGTGGCAGCTATCTGTACAGCAGCCACTGGAAAACCCGCT  
GCNAATATAAGTTGGGAANGAGACTTTGGTAAAATAGAAAATAAATTTNAATTTCTTTTCCAAATAGAACAGTAACA  
GTTTATAAGCCNATATAAGATCATTCCCCTAATTTGCGAGGGGAAGGCNTATAACTTGATTTGTAACAAAGGAA  
GCTTTGGACAGGGAAATAAGGTANTCTCACGTNCTAGACATCCAATATGCTCCTGAAGTNTCAATAACTGGNTAT  
GACGAAATTTGGGTTTTTGGCAGAAAAGTGTCTAGCTTAATTTGTAATGCTAATTTCTAATCCGCCACCTCTAAAA  
TTTACCTGGGCCAGATTAGATGGACAATGGCCTAAAAGGCTTACTGTCTGTAAACAATACTCTGCATTTCAATAGC  
CCACTAACTCACAGTCATAACGGAACCTTATATTTGTAGGGTGACAAAATTCCTTGGTCAAAGAAGTAAATCGAAAG  
ACTATTTACGTATTAATCTCTCCACCATCACTACGACACGACCACCCACCGTTTCATGGTATCCTTCAACTAAT  
AGCATTACAGGTTTAGCGTCAGCATTAACCTCAACAGTAATTCAGGGACGCAGTTGGGGTACCATTATCAGTAGT  
GCAGTAAATGTAAGTCTCTTTCTAGTACTGGGAAGTATTTAATTTGGCATTGTCTGCTATGGGAGAAGACGGACA  
TTACGCAACGAGTATTTCTGTTATGAACCGCATTTACCAGCTAATAAGAGGGAGGAGTCCCAAACAGATGTTCTC  
CAATCAGTTGATGACCAA

>Amis-scaffold-6002\_[AKHW01052890:29546-28263]  
ATGGCTGCCGTGGGGACACCAAGACTGCAAAATGTTTGTGGGTTAGAACTTCTTACGCTGCTTCTTTCCCATCTA  
TGCTGTGGTGCTTTAGTCAAACCAATAGTTGATCCATACATAGCAGCAGTTTGGGAAAGAATGTTACATTGAAA  
TGTACAATCGACATGAATGAAACCATGATACAAATTTCTTGGGAAAAACTGCATGGTAAAAGTGGGAAACTATT  
GTCGTATATCATCCTGAATATGGGTTTTCTGTTCAAAGAGAATACCATGGAAGAGTGTCAATTTAAAACCTCTTCG  
TTCAGTGATATAACAATTGTCTTAAACAACGTGAGTTTCTCTGACGCAGGAAAGTATATATGCAAAGTAGTTACA  
TTCCCATTAGGAAATGCAGAGTCATTAACAACCTGTAACCTGTAATTTGCTGAACCCACTGTGAGCTTTACAAAGGAA  
CCAACCTCCCTTAATAGATAGTCAAATTTGGACAGTAGTACCATGTGTATAGCAGCCACAGGAAAACCTGCTGCA  
AATATAAGTTGGGAAGGAGACTTTGGTAAAATGAAATTTGAATTTAATTTCTTTCCAAATAGAACGGTAAACAGTT  
ATAAGCCAATATAAGATCATTCCCCTAAGTTTGCAACGGGAAGGCGTATAACTTGTATTGTGAAACACCCAGCT  
TTGGACAGGGAAATAAGGTATTCTCACGTAAGTACTAGACATCCAATATGCTCCTGAAGTGTCAATAACTGGCTATAAT  
AAGAATTTGGTTTGTGGACAAAAAATGTTCAACTTAAGTGAATACTAATTTCTAACCAGCCGCTATAAAGTTT  
ACCTGGGCCAGACTAGATGGACAATGGCCTGAAGGCTTACTGTGCGTAAACAGTGTCTTTGCATTTCAATAGCCCA  
TTAACCACAATCATGGCGGAACCTTATATTTGTAGGGTGACAAAATTCCTTGGTCAAAGCAGCGATCAAAGACT  
GTTACGTTGATGATCTCTTACCATCACTACTACACAATCATCCACGGTTCCACGGTATCCTTTAAGTATAAC

ATTGCGAGTTTGGCATCGGCCTTAACCTTAACAGCGATGCCGAAAAGCAATTGGGGTACCATTATCGGTAGTGTA  
ACGGGTGCAGCTTTCTTTCTAATATTTGTAAGCATTTTAGTTGGAGTTATCTGTTACGGAAGAAGGCGCACGTTT  
CGTGGCAGCTACGTCATTGAGGACCACACTCCGTCGACTGACGTAGAGGAAGAGTCTCAAGTAGACGTTTCCCAG  
TCAACTGTT

>Amis-scaffold-11010\_[AKHW01090924:1343-57]

ATGGAGGGGACATCGAGGCAGCGAATGTCCGCCGGGCCAGAACTTGTCTGGCACTGCTCCTCCCTCATTCTGTC  
TGCAGTGTGTTAGTTAGACCTATTGTTGATCCGTACGTAACAGCAGTTTGGGGAAAAGAAATGTCACATTAATAATGT  
ATGATTGACAAGAATGAAACCATAATACAAGTTTTGTGGGAAAAGATATATGATAAAAAATGCACAAACTATTGTT  
GTGCATCATTCTGAATATGGGGTCTCTGTTCAAAGAAAATACCACGGGAGGGTGTGTCTAGAAGTCTTTCGCCC  
ACTGATGCGACAATCAGTATGTATAATGTAGTTTTCTATGATGAAGGAAAGTATATATGCAAAGTAACTACATTC  
CCACTGGGAAATACACAATCGTTAACAATTGTAAGTAACTGTTGTTGAGCCCACTGTAAGTTTCAGCAAGGGGCCA  
AATTCTCTAATAGATGATGGAAAGTGGGCAGTGGCAGCCACTGTACAGCAGCCATTGGGAAACCCGCTGCAAAT  
ATAAGTCGGGAAGGAGACTTTCGGTAAAATGGAATGTAATTCGAATTTCTTTCCAAATAGAACGGTAACAGTTATA  
AGCCAATATAAGATCATTCCCACTAAAATTTGCGAAGGGAAAGGCGTATAACTTGTATTGTGAAACACCCATCTTTG  
GACAGGGAAATAAGGATTTCTCACATACTAGACATCCAATATGCTCCTGAAGTGCAATAACTGGCTATAATAAG  
AATTGGTTTTGTTGGACAAAGAAATGTTCAACTTAAGTGCAATGCTAATTTCAACCCGCCCTATAAAGTTTACC  
TGGGCCAGACTAGATGGACAATGGTCTANAGGCTTACTGTCTGTAACAGTGCTCTGCATTTCAACAGCCCATTA  
ACTCACAATCATGGCGGGACTTACATTTGTAGGGTGATAAATTCCTTGGTCAAAGAAGTGATCAAAAAGACTATT  
CACGTATTAGAGCTTTCTACCATCACTACCACACGATCACCCACGGTTTCATGGTATCCTTCAACTAATAGCATT  
ACAGGTTTAGCATCAGCATTAACTCAACAGTAATTCAGGGACGCAGCTGGGGTACCATCATCGGTAGTGCAGTA  
AGTGTAAAGTCTCTTTCTAGTACTGGGAAGTATTTAATTGGCATTGCTGCTACGGTAGAAAACGGATGTCTCGC  
AGTAACTATTTTGTATGAACCGCGTTTCACTGCCTGATAAAAAGAGAGGAGTCCCAAACAGATGTTCTCCAATCA  
GATGATGACCAA

>Amis-scaffold-5342\_[AKHW01047614:11253-9973]

ATGGAGGGGACACCGAGGCAGCAAATGTCCGCCGGGCCAAAACCTCGCTCTGGCACTGCTCCTCTCTCATTCTGTC  
TGCAGTGTATTAGTTAGACCTGTTGTTGATCCGTATGTAACAGCAGTTTGGGGGAAGAATGTCACATTAATAATGT  
ATGATTGACATGAATGAAACCATAATACAAGTTTTCATGGGNAAGATATATGATAAAAAGTGCACAAACTATTGTT  
GTGCATCATCCNGAATATGGGGTCTCTGTTCAAAGAAAATGCCATGGGAGGGTGTGTCTAGAAGTCTTTCGCCC  
ATTGATGCAACGATTAGTCTGCATAATGTGAGTTTTCTATGATGAAGGAAAGTATATATGCAAAGTAACTACATTC  
CCATTGGGAAATACACAATCGTTAACAATTGTAAGTGTCTTGTGAGCCCACTGTAAGTTTACCAAGGGGCCA  
AATTCTCTAATAGATGATGGAAAGTGGGCAGTGGCAGCCATTTGTACAGCAGCCACTGGGAAACCCGCTGCAAAT  
ATAAGCTGGGAAGGAGACTTTGGTAAAATGGAATATAATTCGAATTTCTTTCCAAATAGAACAGTAACAGTTATA  
AGCCGATATAAGATCATTCTCACTAAAATTTGCGAGGGGAAGGCGTATAACTTGTATTGTGAAACACCCAGCTTTA  
AACAAAGAAATAAGATACTCTCACATACTAGACATCCAATATGCCCTGAAGTATCAATAACTGGTTATGACGGA  
AATTGGGTTTTTCGGCGGAAAAATTGTTTCAGCTTAAGTGCAAAGTTAATTCCAATCCACCACCTACAAAAGTCACC  
TGGACCAGGCTAGATGAACAGTGGTCTGCGGGTTAGTATCCGTGAGTGATATGCTATATTTTCAGTGGCCCATTA  
GCCTACGAATACATTGGAACCTGTATTTGTAGGGTAAACAAATTCATTTGGTCAAAGAAGTGATCAACAACTATC  
CGTATATTATATCCTTCTATTATTACTACACAATCATCCACGGTTCCACGGTATCCTTTAACTAATAACATTACA  
AGTTTGGCATCAGCCTAACCTTAACAGCAATGCAGGAAGGCAATTGGGGTACCATTATCAGTAGTGTAAATGGGT  
GGAGCTTTCTTTCTAATATTTGTAAGCATTTTAGTTAGGGTTATCTGTTACAAAAGAAGGCGAACGTTCCGTGGC  
AACTATGTCATTGAGGACCACACTCCGTCGACTGACATAGAGGAAGAGTTTCAAGTAGATGTTTCCCAGTACGCT  
GATGAT

>Amis-scaffold-9090\_[AKHW01077532:3696-2134]

ATGGAAAACACACATTGGCCCTTTCCACTCCCAGCGCTTGTGGTGGGACAAGTGACACACGCACCTGGCGTGGGG  
AGACGGCGGGCGGTTGGCAGGTGCCCGCCGGGCTGGGGCTCGCTCTGGCGCTGCTCCTCTTCCGCTTCTGCTGC  
ACTGCCTTAGCTGGACTGATTGTTGATCCACACGTAACAGCAGTCTGGGGGAAGAATGTCACGTTAAAATACATA  
ATTGTTATAAATGAAACAATAACACAAATCTCATGGGAGAAAGATACATGGTAAAAGTGCACAAACTGTTGTTGTA  
CATCATCCTGTATATGGGTTTTCTGTTCAAAGAGAATACCATGGAAGAGTGTCATTTAAAACCTTTCGCTCATT  
GATGCAACAATCAGCCTAAACAATGTGAGCTTCTCTGATGCAGGAGAGTATGTATGCAAAGCAGTTATATTTCCA  
CTAGGAAATGCACAGTCGTCAACAACCTGTAAGTGTATTTGTTGAACCCATTGTGAGCCTTACAAAGGGACCAAAC  
TCTTTAATAGATGGTGAATAATCAGACAGTAGCAGCCATTTGTACAGCAGCCACTGGGAAACCTGCTGCAGATGTT  
GATTGGGAAGGANCTTGGTGAATAATGGAATCTAGTTCAACTTCTTTCCAAATGAAACAGTGACAGTTGTAAGT  
CAATATAAAAATCATTCCCTACCAGATTTGCAAGAGGAAGACATATAACTTGTGTTGTAAAGCACCCAGCTTTGGAA  
AAGGAGATAAGATATTCTTACGTGCTGGACATCCAATATGCCCTGAAGTTTTCAGTGAAGTGGCTATGATGGAAT  
TGGTTTCAATGGAAGAGAGAATGTTTCAGCTTAGGTGCAATGCTGATTCTAATCCACTACCTATGGAATTCACCTGG  
ACCAGGCTGGATGGGCAATGGCCTGAAGGCTTACTGTCTATAAAACCATACTCTGCATTTCAACAGCCCACTAAC  
TACAATTACACTGGGACTTGCATCTGTAGGGTGACAAATTCCTTGGTCAAAGAAGCGAACAAAAGACTATCTAC  
ATATTAGATCCTCTACTACTACCACACGACCATCCACAGTTCCATGGCATCCTTCAACTGATGGCATCACAGGT

TTAGCAACAAAACCTAAACTAATATATTTTTCCAGCATCAACCTTGCCAGTAATGCAGGAAGACAATTGGGGTACC  
ATCATCGGTAGTGCAGTGGGTGGGGCTCTCTTCCTGATACTTGTAAGCATTTTGGTTGGAGTTGTCTGCTATAGG  
AGAAGATGGACATTCTGTGGTGACTACTTTGCTAAGAACTACATTCCGCCAACTGATATACAAAAAGAGTTTCAA  
ATAGATGTTCTCCAGTCAGATGATGTGGATTCTTACCCTGACAGTGAAAACAAAAAGAAATAAAGCATCCAATG  
AAAAGTCTGATATCTAAAGACTATTTAGAAGACCCTGAAAAGCCAGAGTGGAACAAATGTAGGCAATATTAACAGG  
TACCAGGAACGGTATGAAAGACCAGTGAACGTGTGTGTTTCTTTAAGGTACTGCAACACTGTC

## Protein sequences of nectin3 retrocopies from CrocERV31

>Amis-scaffold-8548\_[AKHW01073359:7304-8593];Almi-JH736268-P00001  
MAAAGAPRRRTSAGLELALALLLSHFCCGTLIRPIVDPHVAVWGKNVTLKCIIDIKGTIIQISQEKIYGKSAQT  
VVVYHPEYGFVSFQREYHGRVSEFKNSSPTDATIRLNNVSFSDAGEYVCKIVTFPLGNAQSSTTVTVFVEPTVVSFIK  
GPNSLIDGENQTVAAICTAATGKPAADIDWEGDLGEMEFSLTSFPNKMATVVSQYKIIPTRFARGXRITCVVKHP  
ALDKETRYSCVLDIQYVPEVSATGYDRNWFVIGRENVQLRCNAASNPPPEFAWTRLDQWPEGLLSVNNTLHFNS  
PLTYNYAGTYICRVTNLSLQGSQDQKTIHILDPLITITRPPPTVWHPSTNSIIGLAPALTLPMQEDNRGTIIGSA  
VGGTLFLVVFASILAGVICYGRRRRTFRGNVYFVENYIPSTDVEKESQIDVPSQDDDDQ

>Amis-scaffold-1726\_[AKHW01016010:574-1860];Almi-JH732083\_6-P00001  
MAMERAPRQQISVSGSKLALMLLSHFCCSVLVRPVVDPYVAVWGKNVTLKCIININDTIIQVSWEKIYDKSAQT  
IVVHCPEYGVSIQRKYHGRVLSRSSLPIDATISLHNVSYFYDEGKYCKVTTTFPLGNTQSLTIVTVLVKPTVVSFTK  
EPNSLIDDGKWTVAICTAATGKPAANISWEXDFGKIENNIXISFPNRTVTVISXYKIIPTKFARGXRITCIVKHP  
ALDREIRXSHVLDIQYAPEVSIITGYDGNWVFRKNAQLNCNANSNPPPLKFTWARLDGQWPKGLLSVNNTLHFNS  
PLTHSHNGTYICRVTNLSLQGRSNRKTIIYVLNLSTITTTTRPPPTVSWYPSTNSITGLASALTSTVIQGRSWGTTIIS  
AVNVSLFLVLGSLIGIVCYGRRRRTLREYFVMNRISPANKREESPTDVLQSVDDP

>Amis-scaffold-6002\_[AKHW01052890:29546-28263]  
MAAVGTPRLQMFAGLELLTLLLSHLCCGALVKPIVDPYIAAVWGKNVTLKCTIDMNETMIQISWEKHLGKSAETI  
VVYHPEYGFVSQREYHGRVSEFKTSSFSIDITIVLNNVSFSDAGKYICKVTTTFPLGNAESLTTVTVIAEPTVVSFTKE  
PTPLIDSQNWTVVAMCIAATGKPAANISWEGDFGKMKLNYISFPNRTVTVISQYKIIPTKFATGRRITCIVKHPA  
LDREIRYSHVLDIQYAPEVSIITGYNKNWVFGQKNVQLKCNNSNPPPIKFTWARLDGQWPEGLLSVNSALHFNSP  
LTHNHGGTYICRVTNLSLQSSDQKTVHVLDLSTITTTTQSSSTVPRYPLTDNIASLASALTTLTAMPESNWGTIIGSV  
TGAAFFLIFVSVILVGVICYGRRRRTFRGSYVIEDHTPSTDVEEESQVDVVSQSTV

>Amis-scaffold-11010\_[AKHW01090924:1343-57]  
MEGTSRQMSAGPELVLALLLPHFCCSVLVRPIVDPYVAVWGKNVTLKCMIDKNETIIQVLWEKIYDKNAQTIV  
VHHSEYGVSVQRYHGRVLSRSSSPTDATISMYNVSYFYDEGKYICKVTTTFPLGNTQSLTIVTVLVEPTVVSFSKGP  
NSLIDDGKWALAACTAAIGKPAANISREGDFGKMECNSISFPNRTVTVISQYKIIPTKFAKGRITCIVKHPSL  
DREIRYSHILDIQYAPEVSIITGYNKNWVFGQRNVQLKCNANSNPPPIKFTWARLDGQWSXGLLSVNSALHFNSPL  
THNHGGTYICRVINSLQGRSDQKTIHVLELSTITTTTRSPTVSWYPSTNSITGLASALTSTVIQGRSWGTTIIGSAV  
SVSLFLVLGSLIGIVCYGRKRMSRSNYFVMNRVSLPKREESQTDVLQSDDDQ

>Amis-scaffold-5342\_[AKHW01047614:11253-9973]  
MEGTPRQMSAGPKLALALLLSHFCCSVLVRPVVDPYVAVWGKNVTLKCMIDMNETIIQVSWXKIYDKSAQTIV  
VHHPEYGVSVQKCHGRVLSRSSSPIDATISLHNVSYFYDEGKYICKVTTTFPLGNTQSLTIVTVLVEPTVVSFTKGP  
NSLIDDGKWAVAAICTAATGKPAANISWEGDFGKMEYNSISFPNRTVTVISRYKIILTAKFARGRITCIVKHPAL  
NKEIRYSHILDIQYAPEVSIITGYDGNWVFGGKIVQLKCKVNSNPPPTKVTWTRLDQWSAGLVSVSDMLYFSGPL  
AYEYIGTICRVTNISLQGRSDQQTIRILYPSIITTTQSSSTVPRYPLTNNITSLASALTTLTAMQEGNWGTIISVMG  
GAFFLIFVSVILVRVICYKRRRTFRGNVYVIEDHTPSTDIEEEEFQVDVVSQSADD

>Amis-scaffold-9090\_[AKHW01077532:3696-2134]  
MENTHWPFPALVVGQVTHAPGVGRRRRRQVPAGLGLALALLLFRFCCTALAGLIVDPHVAVWGKNVTLKYI  
IVINETITQISWEKIHGKSAQTVVHHHPVYGFVSQREYHGRVSEFKNSSLIDATISLNNVSFSDAGEYVCKAVIFP  
LGNAQSSTTVTVFVEPIVSLTKGPNLIDGENQTVAAICTAATGKPAADVWEGXLGEMESSSTSFNETVTVVS  
QYKIIPTRFARGRHITCVVKHPALEKEIRYSYVLDIQYAPEVSVTGYDGNWVIGRENVQLRCNADSNPLPMEFTW  
TRLDGQWPEGLLSINHTLHFNSPLTYNYTGTCICRVTNLSLQGRSEQKTIYILDPPPTTTTRPSTVWHPSTDGITG  
LATKPKLIYFPASTLPVMQEDNWGTIIGSAVGGALFLILVSVILVGVVCYRRRWTFCGDYFAKNYIIPPTDIQKEFQ  
IDVLQSDDDVSDYPSSENKKEIKHPMKSLISKDYLEDPEKPEWNNVGNINRYQERYERPVNCCVSLRYCNTV
